# Supplementary material for: Social insecurity in relation to orbitofrontal activity in patients with eating disorders: a near-infrared spectroscopy study
Source: BMC Psychiatry. 2014 Jun 12;14:173. doi: 10.1186/1471-244X-14-173 (PMC4067083; doi:10.1186/1471-244X-14-173)
Supplement: Additional file 7 — Correlation between the mean change in oxygenated hemoglobin concentration during the letter fluency task and the social insecurity score in the control group. [file 1471-244X-14-173-S7.xls]

## Sheet: Sheet1
Correlation between the mean change in oxygenated hemoglobin concentration during the letter fluency task and the social insecurity score in the control group
Channels	r	p	p'		Partial correlation coefficient	p	p'
Ch1	-0.457	†0.02	0.136171		-0.4418	0.0758135	0.416975
Ch2	-0.199859	0.28965	0.335384		-0.304351	0.234942	0.323045
Ch3	-0.0593638	0.755339	0.755339		-0.204994	0.429955	0.450429
Ch4	-0.178687	0.344785	0.379263		-0.124792	0.63321	0.63321
Ch5	-0.558	†† < 0.01	0.101267		-0.569435	†0.02	0.374744
Ch6	-0.262844	0.153126	0.259137		-0.366113	0.148376	0.272023
Ch7	-0.109894	0.563202	0.590021		-0.240743	0.351959	0.430172
Ch8	-0.260321	0.157254	0.216225		-0.359625	0.156252	0.264427
Ch9	-0.266111	0.155202	0.243889		-0.224617	0.386089	0.424698
Ch10	-0.467	†† < 0.01	0.0889117		-0.525367	†0.03	0.333668
Ch11	-0.257053	0.162719	0.198879		-0.458676	0.0640466	0.469675
Ch12	-0.296888	0.104829	0.256248		-0.38243	0.12978	0.317239
Ch13	-0.365	0.0435732	0.136944		-0.438543	0.0782552	0.344323
Ch14	-0.265746	0.155791	0.228493		-0.318144	0.213324	0.335224
Ch15	-0.283246	0.129333	0.284532		-0.378473	0.134132	0.295091
Ch16	-0.265059	0.149567	0.274206		-0.370044	0.143739	0.287478
Ch17	-0.378	†0.04	0.131405		-0.390667	0.121036	0.3804
Ch18	-0.42	†0.02	0.169763		-0.387752	0.124081	0.341224
Ch19	-0.257801	0.161458	0.208945		-0.258606	0.316234	0.409244
Ch20	-0.279992	0.133984	0.267969		-0.233791	0.366457	0.424319
Ch21	-0.311389	0.0881603	0.242441		-0.408145	0.103867	0.380846
Ch22	-0.399	††0.03	0.141904		-0.316898	0.215222	0.315659
† p < 0.05 before correction by the false discovery rate method; †† p < 0.01 before correction by the false discovery rate method; r, Pearson product-moment correlation coefficient; p, p values without correction; p', p values with correction by the false discovery rate method. BDI, Beck Depression Inventory; BMI, body mass index.
